# Supplementary material for: Application of Trichoderma Hz36 and Hk37 as Biocontrol Agents against Clubroot Caused by Plasmodiophora brassicae
Source: MDPI journal article supplement (doi:10.3390/jof8080777), 2022-07-26
Supplement: s1 [file s1]

Article

# Application of *Trichoderma* Hz36 and Hk37 as Biocontrol Agents against Clubroot Caused by *Plasmodiophora brassicae*

Yanli Zhao, Xingfu Chen, Jiasen Cheng, Jiatao Xie, Yang Lin, Daohong Jiang and Yanping Fu \* and Tao Chen \*

Supplement information:

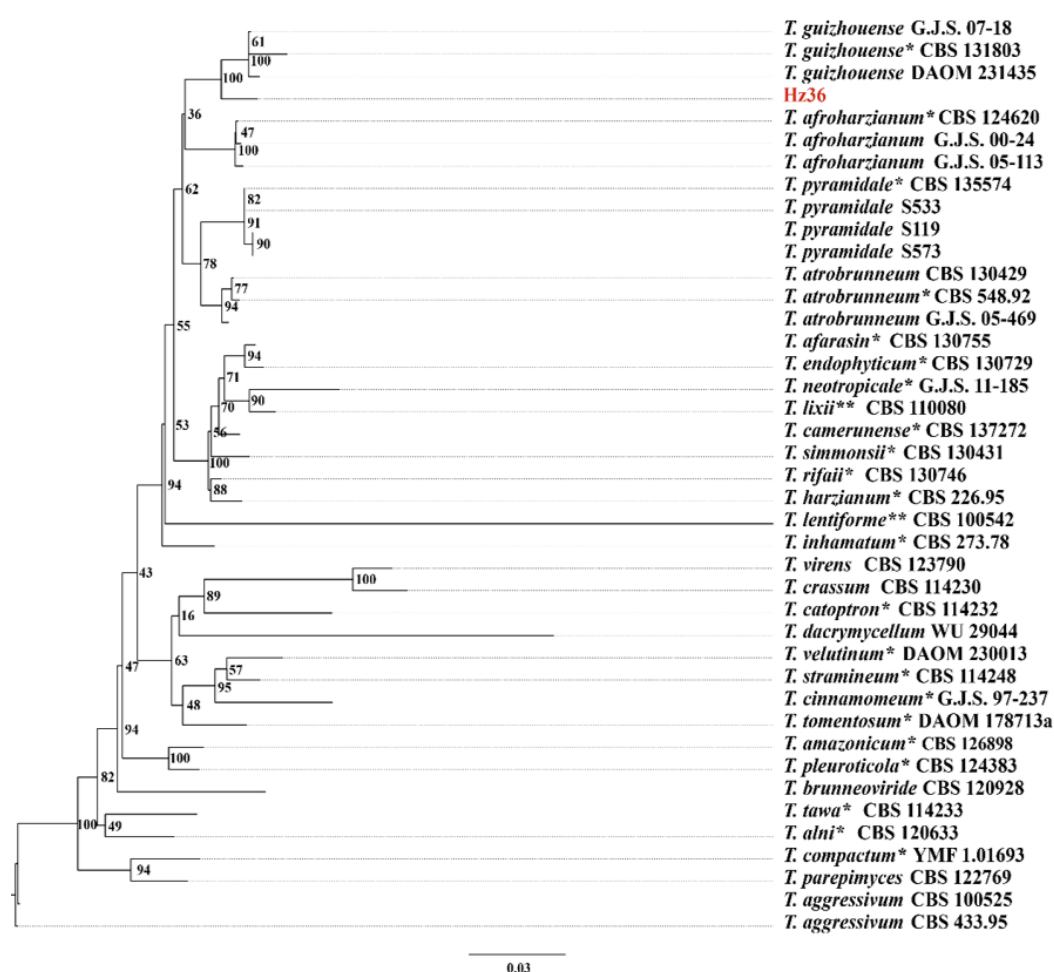

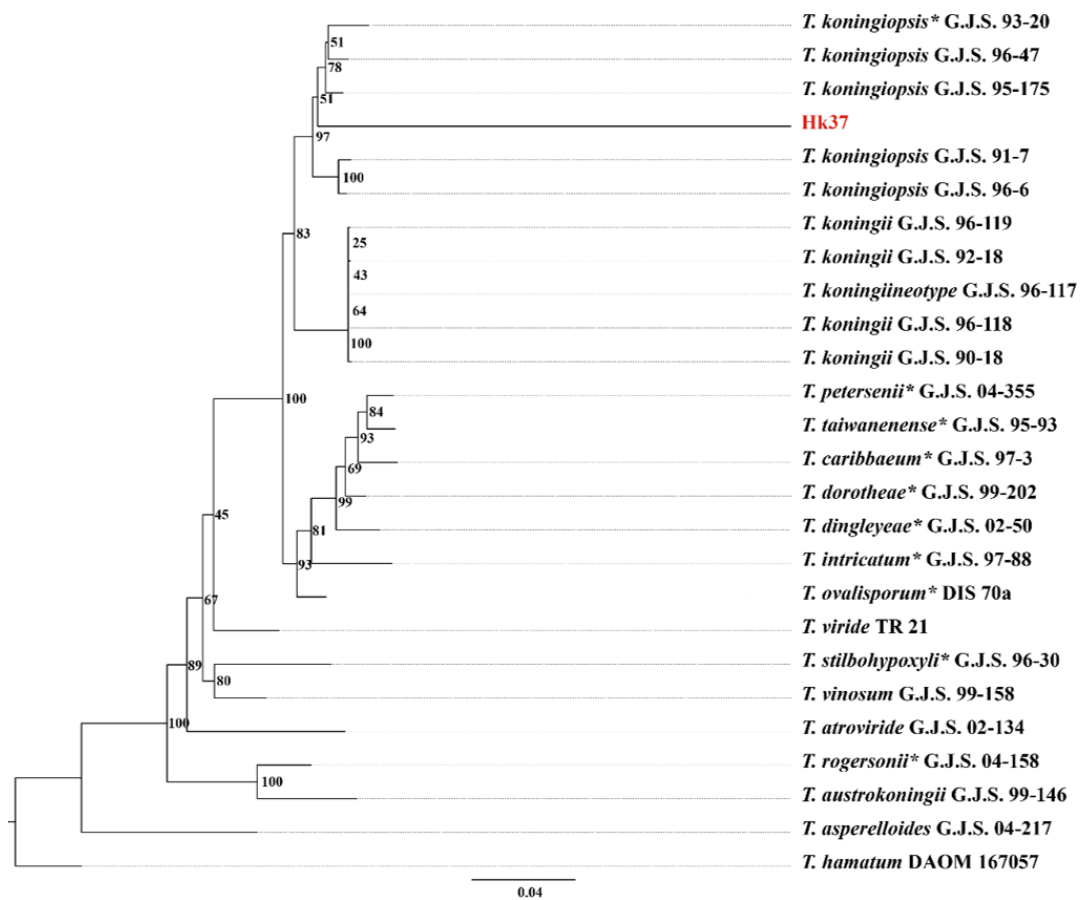

**Figure S2.** Identification of Hk37. Maximum likelihood tree based on (*TEF1-CAL-ACT*) sequences from 25 *Trichoderma*. *T. hamatum* DAOM 167057 was selected as the outgroup. Ex-type strains were emphasized in star. Scale bar = 0.04.

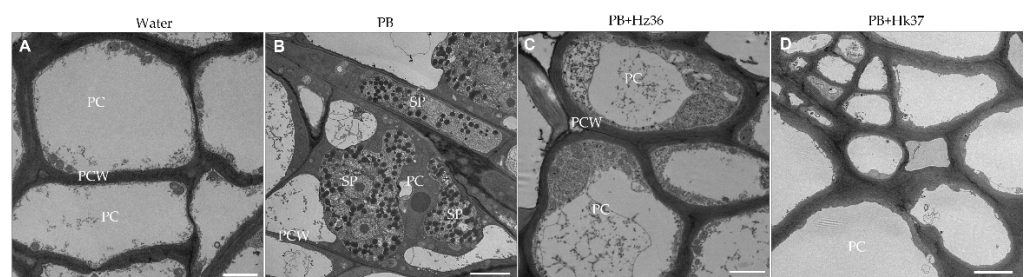

**Figure S3.** Transmission electron microscopy observation of *P. brassicae* treated with strain Hz36 and Hk37. (A) Rapeseed inoculated with water as a negative control. (B) Rapeseed inoculated with *P. brassicae* alone for 30 days. (C) Rapeseed co-inoculated with *P. brassicae* and Hz36 strain for 30 days. (D) Rapeseed co-inoculated with *P. brassicae* and Hk37 strain for 30 days. The scale bar = 2  $\mu$ m, PC = plant cell; PCW = plant cell wall; SP = secondary plasmodium.

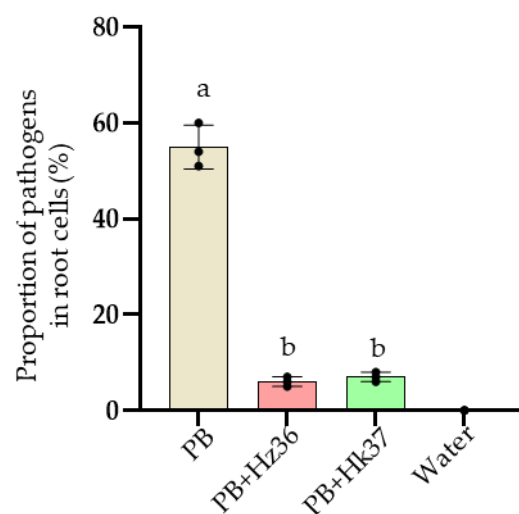

**Figure S4.** Proportion of *P. brassicae* in root cells of inoculated with *P. brassicae* alone or co-inoculated, inoculated with water only as a negative control. Results show the means  $\pm$  s.d. ( $n = 3$  biological replicates), data analyzed with one-way ANOVA by Tukey's multiple comparisons were conducted using Prism 8. significance set at  $P \leq 0.05$ . Different letters (a and b) shown significantly different.

Table S1. The information of 44 endophyte fungi isolated from the symptomatic and asymptomatic roots of rapeseed infected by *P. brassicae* in severely infected fields.

| Strain | domain | Phylum       | Class           | Order        | Family        | Genus       | Species                  | Biocontrol efficiency |
|--------|--------|--------------|-----------------|--------------|---------------|-------------|--------------------------|-----------------------|
| 22     | Fungi  | Ascomycota   | Dothideomycetes | Pleosporales | Pleosporaceae | Alternaria  | Alternaria tenuissima    | NA                    |
| 44     | Fungi  | Ascomycota   | Sordariomycetes | Hypocreales  | Nectriaceae   | Fusarium    | Fusarium proliferatum    | NA                    |
| 7      | Fungi  | Ascomycota   | Sordariomycetes | Hypocreales  | Hypocreaceae  | Hypocrea    | Hypocrea lixii           | 32.13%                |
| 38     | Fungi  | Ascomycota   | Sordariomycetes | Hypocreales  | Hypocreaceae  | Hypocrea    | Hypocrea lixii           | 10.92%                |
| 15     | Fungi  | Ascomycota   | Sordariomycetes | Hypocreales  | Hypocreaceae  | Hypocrea    | unclassified Hypocrea    | NA                    |
| 3      | Fungi  | Mucoromycota | Mucoromycetes   | Mucorales    | Mucoraceae    | Mucor       | Mucor circinelloides     | NA                    |
| 2      | Fungi  | Mucoromycota | Mucoromycetes   | Mucorales    | Mucoraceae    | Mucor       | Mucor hiemalis           | NA                    |
| 9      | Fungi  | Mucoromycota | Mucoromycetes   | Mucorales    | Mucoraceae    | Mucor       | Mucor hiemalis           | NA                    |
| 10     | Fungi  | Mucoromycota | Mucoromycetes   | Mucorales    | Mucoraceae    | Mucor       | Mucor hiemalis           | NA                    |
| 16     | Fungi  | Mucoromycota | Mucoromycetes   | Mucorales    | Mucoraceae    | Mucor       | M. racemosus             | NA                    |
| 39     | Fungi  | Oomycota     | Oomycetes       | Pythiales    | Pythiaceae    | Pythium     | Pythium coloratum        | NA                    |
| 40     | Fungi  | Oomycota     | Oomycetes       | Pythiales    | Pythiaceae    | Pythium     | Pythium coloratum        | NA                    |
| 41     | Fungi  | Oomycota     | Oomycetes       | Pythiales    | Pythiaceae    | Pythium     | Pythiumcoloratum         | NA                    |
| 32     | Fungi  | Ascomycota   | Sordariomycetes | Hypocreales  | Hypocreaceae  | Trichoderma | Trichoderma atroviride   | NA                    |
| 34     | Fungi  | Ascomycota   | Sordariomycetes | Hypocreales  | Hypocreaceae  | Trichoderma | Trichoderma atroviride   | NA                    |
| 17     | Fungi  | Ascomycota   | Sordariomycetes | Hypocreales  | Hypocreaceae  | Trichoderma | Trichoderma atroviridis  | NA                    |
| 19     | Fungi  | Ascomycota   | Sordariomycetes | Hypocreales  | Hypocreaceae  | Trichoderma | Trichoderma atroviridis  | NA                    |
| 20     | Fungi  | Ascomycota   | Sordariomycetes | Hypocreales  | Hypocreaceae  | Trichoderma | Trichoderma atroviridis  | NA                    |
| 23     | Fungi  | Ascomycota   | Sordariomycetes | Hypocreales  | Hypocreaceae  | Trichoderma | Trichoderma atroviridis  | NA                    |
| 24     | Fungi  | Ascomycota   | Sordariomycetes | Hypocreales  | Hypocreaceae  | Trichoderma | Trichoderma atroviridis  | NA                    |
| 33     | Fungi  | Ascomycota   | Sordariomycetes | Hypocreales  | Hypocreaceae  | Trichoderma | Trichoderma atroviridis  | NA                    |
| 5      | Fungi  | Ascomycota   | Sordariomycetes | Hypocreales  | Hypocreaceae  | Trichoderma | Trichoderma atroviridis  | NA                    |
| 6      | Fungi  | Ascomycota   | Sordariomycetes | Hypocreales  | Hypocreaceae  | Trichoderma | Trichoderma atroviridis  | NA                    |
| 11     | Fungi  | Ascomycota   | Sordariomycetes | Hypocreales  | Hypocreaceae  | Trichoderma | Trichoderma atroviridis  | NA                    |
| 12     | Fungi  | Ascomycota   | Sordariomycetes | Hypocreales  | Hypocreaceae  | Trichoderma | Trichoderma atroviridis  | NA                    |
| 13     | Fungi  | Ascomycota   | Sordariomycetes | Hypocreales  | Hypocreaceae  | Trichoderma | Trichoderma atroviridis  | NA                    |
| 14     | Fungi  | Ascomycota   | Sordariomycetes | Hypocreales  | Hypocreaceae  | Trichoderma | Trichoderma atroviridis  | 19.39%                |
| 25     | Fungi  | Ascomycota   | Sordariomycetes | Hypocreales  | Hypocreaceae  | Trichoderma | Trichoderma atroviridis  | NA                    |
| 26     | Fungi  | Ascomycota   | Sordariomycetes | Hypocreales  | Hypocreaceae  | Trichoderma | Trichoderma atroviridis  | NA                    |
| 27     | Fungi  | Ascomycota   | Sordariomycetes | Hypocreales  | Hypocreaceae  | Trichoderma | Trichoderma atroviridis  | -10.28%               |
| 28     | Fungi  | Ascomycota   | Sordariomycetes | Hypocreales  | Hypocreaceae  | Trichoderma | Trichoderma atroviridis  | NA                    |
| 29     | Fungi  | Ascomycota   | Sordariomycetes | Hypocreales  | Hypocreaceae  | Trichoderma | Trichoderma atroviridis  | NA                    |
| 43     | Fungi  | Ascomycota   | Sordariomycetes | Hypocreales  | Hypocreaceae  | Trichoderma | Trichoderma atroviridis  | NA                    |
| 36     | Fungi  | Ascomycota   | Sordariomycetes | Hypocreales  | Hypocreaceae  | Trichoderma | Trichoderma guizhouense  | 52.18%                |
| 1      | Fungi  | Ascomycota   | Sordariomycetes | Hypocreales  | Hypocreaceae  | Trichoderma | Trichoderma harzianum    | NA                    |
| 8      | Fungi  | Ascomycota   | Sordariomycetes | Hypocreales  | Hypocreaceae  | Trichoderma | Trichoderma harzianum    | NA                    |
| 21     | Fungi  | Ascomycota   | Sordariomycetes | Hypocreales  | Hypocreaceae  | Trichoderma | Trichoderma harzianum    | NA                    |
| 42     | Fungi  | Ascomycota   | Sordariomycetes | Hypocreales  | Hypocreaceae  | Trichoderma | Trichoderma harzianum    | 10%                   |
| 37     | Fungi  | Ascomycota   | Sordariomycetes | Hypocreales  | Hypocreaceae  | Trichoderma | Trichoderma koningiopsis | 68.01%                |
| 4      | Fungi  | Ascomycota   | Sordariomycetes | Hypocreales  | Hypocreaceae  | Trichoderma | Trichoderma viride       | NA                    |
| 18     | Fungi  | Ascomycota   | Sordariomycetes | Hypocreales  | Hypocreaceae  | Trichoderma | Trichoderma viride       | 5%                    |
| 30     | Fungi  | Ascomycota   | Sordariomycetes | Hypocreales  | Hypocreaceae  | Trichoderma | Trichoderma viride       | NA                    |
| 31     | Fungi  | Ascomycota   | Sordariomycetes | Hypocreales  | Hypocreaceae  | Trichoderma | Trichoderma viride       | NA                    |
| 35     | Fungi  | Ascomycota   | Sordariomycetes | Hypocreales  | Hypocreaceae  | Trichoderma | Trichoderma viride       | NA                    |

Note: Fonts marked in red indicated the strain was selected against *P. brassicae* in Arabidopsis in the green house condition, inoculated with *P. brassicae* for 21 days.

Table S2. Strains used in Hz36 phylogenetic analysis and their GenBank numbers.

| Species                            | Culture number | GenBank accession number |             |            |            |
|------------------------------------|----------------|--------------------------|-------------|------------|------------|
|                                    |                | <i>ACT</i>               | <i>TEF1</i> | <i>CAL</i> | <i>ITS</i> |
| <i>Trichoderma afarasin</i> *      | CBS 130755     | FJ442536                 | AF348093    | FJ442388   | AY027784   |
| <i>Trichoderma afroharzianum</i> * | CBS 124620     | -                        | FJ463301    | FJ442370   | FJ442265   |
| <i>Trichoderma afroharzianum</i>   | G.J.S. 00-24   | FJ442488                 | AF443940    | AF442880   | AF443922   |
| <i>Trichoderma afroharzianum</i>   | G.J.S. 05-113  | FJ442571                 | FJ463378    | FJ442371   | FJ442235   |
| <i>Trichoderma aggressivum</i>     | CBS 100525     | FJ442433                 | AF348095    | AF442859   | AF057600   |
| <i>Trichoderma aggressivum</i>     | CBS 433.95     | FJ442436                 | AF348097    | FJ442279   | FJ442605   |
| <i>Trichoderma alni</i> *          | CBS 120633     | GQ250315                 | EU498312    | EU498326   | EU518651   |
| <i>Trichoderma amazonicum</i> *    | CBS 126898     | -                        | HM142376    | -          | HM142358   |
| <i>Trichoderma atrobrunneum</i> *  | CBS 548.92     | FJ442528                 | AF443942    | AF442883   | AF443924   |
| <i>Trichoderma atrobrunneum</i>    | G.J.S. 05-469  | FJ442502                 | FJ463304    | FJ442340   | FJ442629   |
| <i>Trichoderma atrobrunneum</i>    | CBS 130429     | FJ442525                 | AF443943    | AF442886   | AF443926   |
| <i>Trichoderma brunneoviride</i>   | CBS 120928     | -                        | EU498318    | EU498330   | EU518661   |
| <i>Trichoderma camerunense</i> *   | CBS 137272     | FJ442537                 | AF348107    | AF442875   | AY027780   |
| <i>Trichoderma catoptron</i> *     | CBS 114232     | FJ442584                 | AY737726    | FJ442387   | AY737766   |
| <i>Trichoderma cinnamomeum</i>     | G.J.S. 97-237  | FJ442582                 | AY737732    | JN133524   | AY737759   |
| <i>Trichoderma compactum</i> *     | YMF 1.01693    | -                        | AY941824    | -          | -          |
| <i>Trichoderma crassum</i>         | CBS 114230     | -                        | JN133572    | -          | -          |
| <i>Trichoderma dacrymycellum</i>   | WU 29044       | -                        | FJ860633    | -          | FJ860749   |
| <i>Trichoderma endophyticum</i> *  | CBS 130729     | FJ442445                 | FJ463319    | FJ442292   | FJ442243   |
| <i>Trichoderma guizhouense</i> *   | CBS 131803     | -                        | JN215484    | -          | JN191311   |
| <i>Trichoderma guizhouense</i>     | DAOM 231435    | -                        | EF191321    | FJ577721   | EF191296   |
| <i>Trichoderma guizhouense</i>     | G.J.S. 07-18   | FJ442521                 | FJ463390    | FJ442355   | FJ442641   |
| <i>Trichoderma harzianum</i> *     | CBS 226.95     | FJ442567                 | AF348101    | AF442864   | AJ222720   |
| <i>Trichoderma inhamatum</i> *     | CBS 273.78     | FJ442561                 | AF348099    | AF442891   | FJ442680   |
| <i>Trichoderma lentiforme</i> **   | CBS 100542     | AF469193                 | AF469195    | AF469191   | AF469189   |
| <i>Trichoderma lixii</i> **        | CBS 110080     | FJ442533                 | AF443938    | AF442872   | AF443920   |
| <i>Trichoderma neotropicale</i> *  | G.J.S. 11-185  | KP115268                 | HQ022771    | KP115279   | HQ022407   |
| <i>Trichoderma parepimyces</i>     | CBS 122769     | -                        | FJ860664    | -          | FJ860800   |
| <i>Trichoderma pleuroticola</i> *  | CBS 124383     | JN133598                 | HM142381    | JN133538   | HM142362   |
| <i>Trichoderma pyramidale</i> *    | CBS 135574     | -                        | KJ665699    | -          | -          |
| <i>Trichoderma pyramidale</i>      | S119           | -                        | KJ665696    | -          | -          |
| <i>Trichoderma pyramidale</i>      | S533           | -                        | KJ665697    | -          | -          |
| <i>Trichoderma pyramidale</i>      | S573           | -                        | KJ665698    | -          | -          |
| <i>Trichoderma rifaii</i> *        | CBS 130746     | FJ442474                 | FJ463324    | -          | FJ442663   |
| <i>Trichoderma simmonsii</i> *     | CBS 130431     | FJ442526                 | AF443935    | AF442869   | AF443917   |
| <i>Trichoderma stramineum</i> *    | CBS 114248     | FJ442583                 | AY737746    | FJ442386   | AY737765   |
| <i>Trichoderma tawa</i> *          | CBS 114233     | FJ442570                 | FJ463313    | FJ442406   | AY737756   |
| <i>Trichoderma tomentosum</i> *    | DAOM 178713a   | JN133612                 | AY750882    | JN133548   | EU330958   |
| <i>Trichoderma velutinum</i> *     | DAOM 230013    | JN133614                 | AY937415    | JN133550   | AF149873   |
| <i>Trichoderma virens</i>          | CBS 123790     | FJ442589                 | AY750894    | FJ442404   | DQ083023   |

Note: Ex-type strains were emphasized in star.

Table S3. Strains used in Hk37 phylogenetic analysis and their GenBank numbers.

| Species                             | Strain        | GenBank accession number |            |            |
|-------------------------------------|---------------|--------------------------|------------|------------|
|                                     |               | <i>TEF1</i>              | <i>CAL</i> | <i>ACT</i> |
| <i>Trichoderma atroviride</i>       | G.J.S. 02-134 | DQ307547                 | -          | -          |
| <i>Trichoderma austrokonigii</i> *  | G.J.S. 99-146 | DQ307561                 | DQ379001   | DQ367716   |
| <i>Trichoderma asperellum</i>       | G.J.S. 04-217 | DQ381958                 | DQ379002   | DQ333564   |
| <i>Trichoderma caribbaeum</i> *     | G.J.S. 97-3   | DQ284977                 | DQ367688   | DQ328607   |
| <i>Trichoderma dingleyae</i> *      | G.J.S. 02-50  | DQ284978                 | DQ370461   | DQ367718   |
| <i>Trichoderma dorotheae</i> *      | G.J.S. 99-202 | DQ307536                 | DQ367706   | DQ323454   |
| <i>Trichoderma hamatum</i>          | DAOM 167057   | AF456911                 | DQ122154   | DQ111962   |
| <i>Trichoderma intricatum</i> *     | G.J.S. 97-88  | AY376060                 | DQ367680   | AY376684   |
| <i>Trichoderma konigii</i>          | G.J.S. 96-117 | AF456909                 | DQ367686   | DQ341180   |
| <i>Trichoderma konigii</i>          | G.J.S. 90-18  | DQ289007                 | DQ370463   | DQ341181   |
| <i>Trichoderma konigii</i>          | G.J.S. 92-18  | DQ289005                 | DQ370458   | DQ367712   |
| <i>Trichoderma konigii</i>          | G.J.S. 96-118 | DQ288996                 | DQ367683   | DQ341178   |
| <i>Trichoderma konigii</i>          | G.J.S. 96-119 | DQ289003                 | DQ367681   | DQ341179   |
| <i>Trichoderma koningiopsis</i>     | G.J.S. 91-6   | DQ307539                 | DQ367705   | DQ323446   |
| <i>Trichoderma koningiopsis</i>     | G.J.S. 91-7   | DQ284969                 | DQ367689   | DQ323449   |
| <i>Trichoderma koningiopsis</i>     | G.J.S. 95-175 | AF456910                 | DQ367707   | DQ323448   |
| <i>Trichoderma koningiopsis</i>     | G.J.S. 96-47  | AY376044                 | DQ367670   | AY376677   |
| <i>Trichoderma koningiopsis</i> *   | G.J.S. 93-20  | DQ284966                 | DQ367694   | DQ381954   |
| <i>Trichoderma ovalisporum</i> *    | DIS 70a       | AY376037                 | DQ379005   | AY376671   |
| <i>Trichoderma petersenii</i> *     | G.J.S. 04-355 | DQ284980                 | DQ367691   | DQ333570   |
| <i>Trichoderma rogersonii</i> *     | G.J.S. 04-158 | DQ307563                 | DQ370460   | DQ333567   |
| <i>Trichoderma stilbohypoxyli</i> * | G.J.S. 96-30  | DQ109546                 | DQ122161   | DQ111967   |
| <i>Trichoderma taiwanense</i> *     | G.J.S. 95-93  | DQ284973                 | DQ367685   | DQ323455   |
| <i>Trichoderma viride</i>           | TR 21         | AY376054                 | DQ122165   | AY376681   |
| <i>Hypocrea vinosa</i>              | G.J.S. 99-158 | AY376047                 | DQ122158   | AY376680   |

Note: Ex-type strains were emphasized in star.

Table S4. Primer sequences used in this paper.

| Primer name | Primers sequence (5'→3') | Target      |
|-------------|--------------------------|-------------|
| ITS1        | TCCGTAGGTGAACCTGCGG      | ITS         |
| ITS4        | TCCTCCGCTTATTGATATGC     | ITS         |
| ITS5        | GGAAGTAAAAGTCGTAACAAGG   | ITS         |
| Tact1       | TGGCACCACACCTTCTACAATGA  | <i>ACT</i>  |
| Tact2       | TCTCCTTCTGCATACGGTCGGA   | <i>ACT</i>  |
| EF1-728F    | CATCGAGAAGTTCGAGAAGG     | <i>TEF1</i> |
| EF1-1R      | GCCATCCTTGGGAGATACCAGC   | <i>TEF2</i> |
| CAL-228F    | GAGTTCAAGGAGGCCTTCTCCC   | <i>CAL</i>  |
| CAL-737R    | CATCTTTCTGGCCATCATGG     | <i>CAL</i>  |
| Pbactin-F   | CACCGACTACCTGATGAA       | qRT-PCR     |
| Pbactin-R   | CAGCTTCTCCTTGATGTC       | qRT-PCR     |
| Atactin-F   | AATCCACGAGACAACCTA       | qRT-PCR     |
| Atactin-R   | AGCGATACCTGAGAACATA      | qRT-PCR     |
| Bnactin-F   | TGAAGATCAAGGTGGTCGCA     | qRT-PCR     |
| Bnactin-R   | GAAGGCAGAAACACTTAGAAG    | qRT-PCR     |
